# Supplementary material
Source: MDPI journal article supplement (https://www.mdpi.com/2073-4344/11/12/1443)
Supplement: s1 [file s1]

# *Microcystis*@TiO<sub>2</sub> Nanoparticles for Photocatalytic Reduction Reactions: Nitrogen Fixation and Hydrogen Evolution

Xuan Li <sup>1,2</sup>, Jingcai Chang <sup>1,\*</sup>, Shijie Zhang <sup>1,2</sup>, Lihui Xiao <sup>1,2</sup>, Xiaoge Wu <sup>3,\*</sup> and Zuoli He <sup>1,2,\*</sup>

<sup>1</sup> Shandong Key Laboratory of Water Pollution Control and Resource Reuse, School of Environmental Science and Engineering, Shandong University, Qingdao 266237, China; 202012951@mail.sdu.edu.cn (X.L.); 201912711@mail.sdu.edu.cn (S.Z.); 201922210085@mail.sdu.edu.cn (L.X.)

<sup>2</sup> Suzhou Research Institute, Shandong University, Suzhou 215123, China

<sup>3</sup> School of Environmental Science and Engineering, Yangzhou University, Yangzhou 225000, China

\* Correspondence: changjingcai@sdu.edu.cn (J.C.); xgwu@yzu.edu.cn (X.W.); zlhe@sdu.edu.cn (Z.H.)

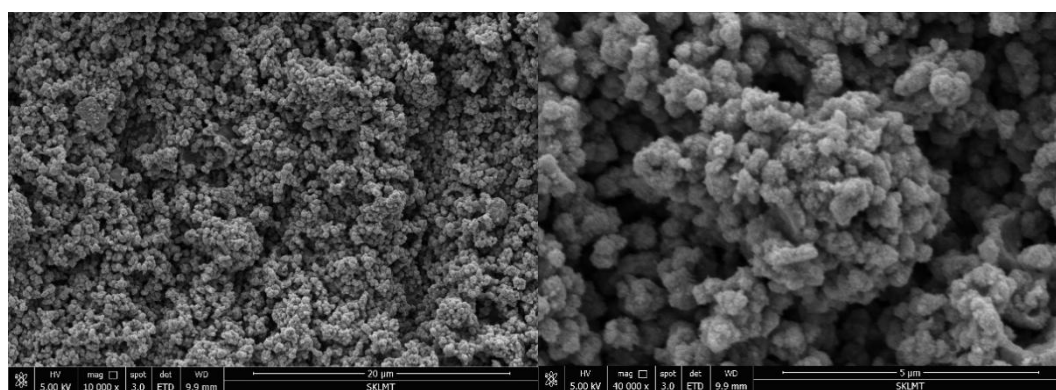

**Figure S1.** The SEM image of the *Microcystis*@TiO<sub>2</sub> sample without calcination.

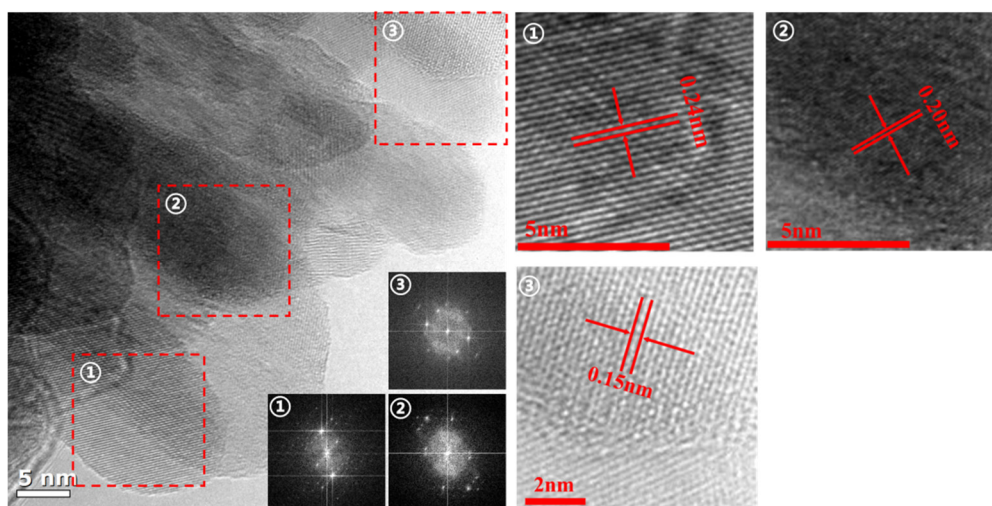

**Figure S2.** The TEM image of *Microcystis*@TiO<sub>2</sub>-550.

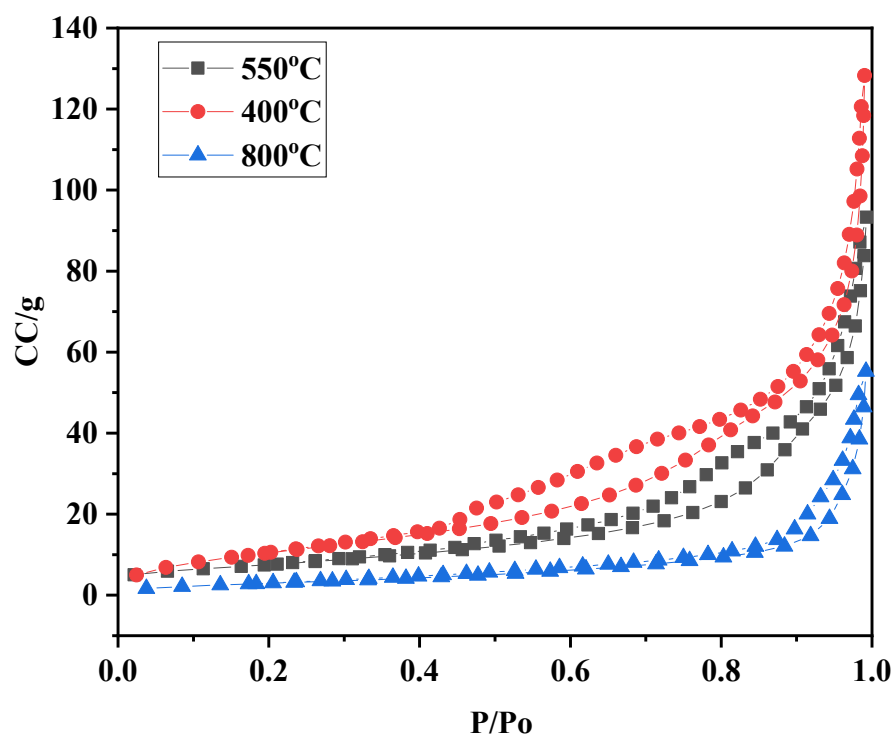

**Figure S3.** The nitrogen adsorption-desorption isotherms of *Microcystis*@TiO<sub>2</sub> samples.

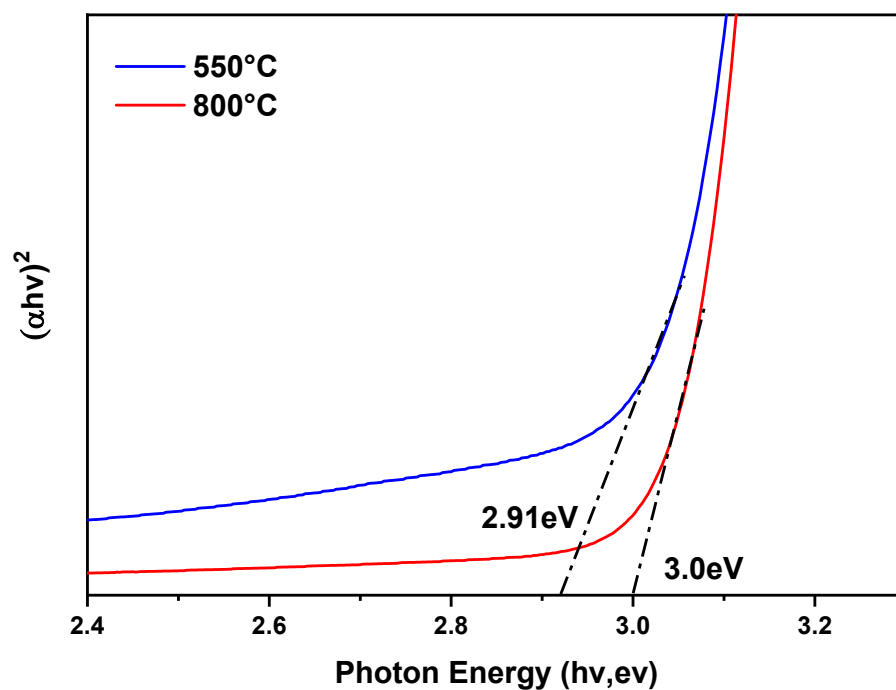

**Figure S4.** The Kubelka-Munk function vs. light energy of *Microcystis*@TiO<sub>2</sub> samples.

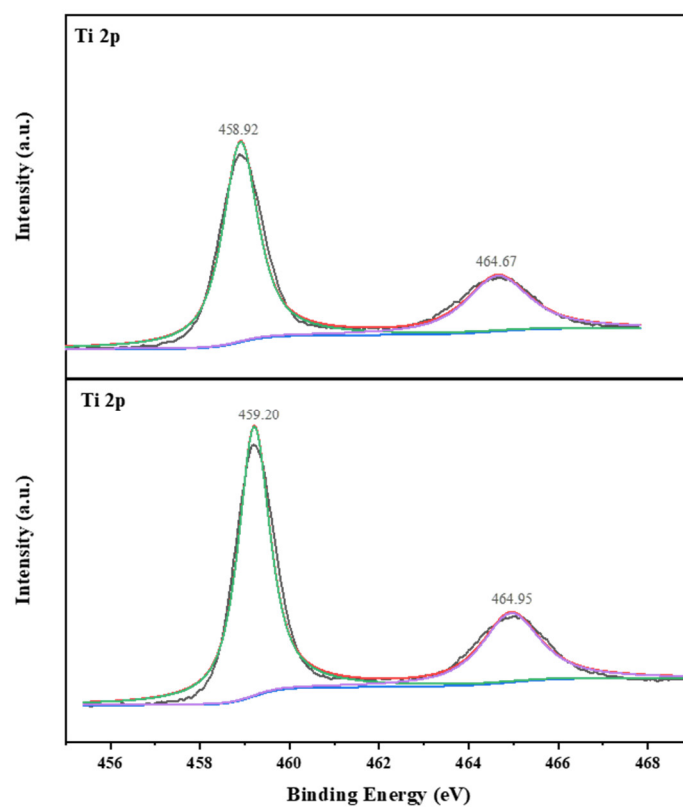

**Figure S5.** The Ti 2p high resolution spectra of samples without calcination (top) and *Microcystis*@TiO<sub>2</sub>-550 (down).

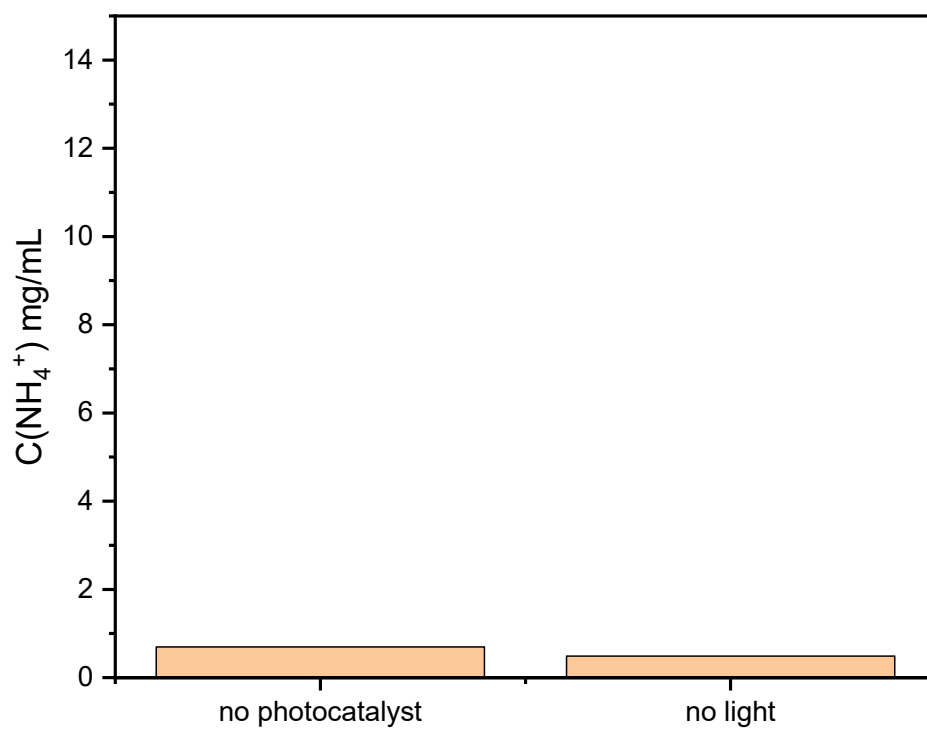

**Figure S6.** The production of  $\text{NH}_3$  in the absence of photocatalyst and light irradiation.

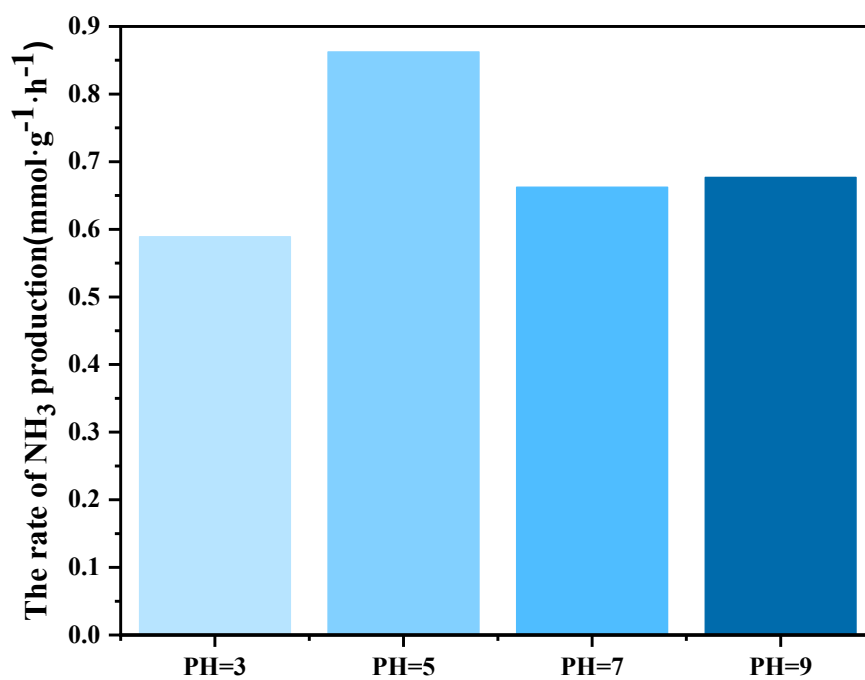

**Figure S7.** The rate of  $\text{NH}_3$  production under different pH conditions.

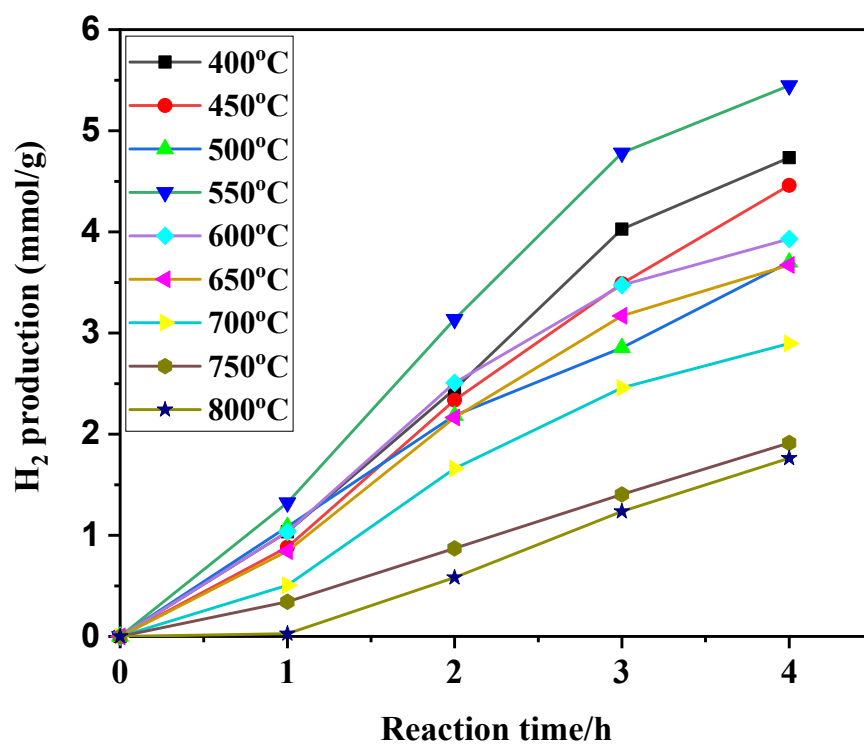

Figure S8. The production of H<sub>2</sub> under 4h illumination.
